# Supplementary material for: Thorium(iv) alkyl and allyl complexes of a rigid NON-donor pincer ligand with flanking 1-adamantyl substituents
Source: Royal Society of Chemistry journal article supplement (doi:10.1039/c8dt00421h), 2018-01-01

Electronic Supplementary Information

**Thorium(IV) Alkyl and Allyl Complexes of a Rigid NON-Donor Pincer  
Ligand with Flanking 1-Adamantyl Substituents**

*Nicholas R. Andreychuk,<sup>a</sup> Tara Dickie,<sup>a</sup> David J. H. Emslie,<sup>\*a</sup> and Hilary A. Jenkins,<sup>a</sup>*

<sup>a</sup> Department of Chemistry, McMaster University, 1280 Main St. West, Hamilton, Ontario, L8S  
4M1, Canada. Fax: (905)-522-2509; Tel: (905)-525-9140 x 23307.

E-mail: [emslie@mcmaster.ca](mailto:emslie@mcmaster.ca).

Website: <http://www.chemistry.mcmaster.ca/emslie/emslie.html>

-----  
Contents

1. <sup>1</sup>H and <sup>13</sup>C{<sup>1</sup>H} NMR spectra of H<sub>2</sub>[XAd] (**1**)
2. <sup>1</sup>H and <sup>13</sup>C{<sup>1</sup>H} NMR spectra of [{K(THF)<sub>3</sub>]<sub>2</sub>(XAd)] (**2a**)
3. <sup>1</sup>H and <sup>13</sup>C{<sup>1</sup>H} NMR spectra of [(XAd)ThCl<sub>4</sub>K<sub>2</sub>]·(dme) (**3**)
4. <sup>1</sup>H, <sup>13</sup>C{<sup>1</sup>H}, and <sup>13</sup>C NMR spectra of [(XAd)Th(CH<sub>2</sub>SiMe<sub>3</sub>)<sub>2</sub>(THF)] (**4**)
5. Variable Temperature <sup>1</sup>H NMR spectra of [(XAd)Th(CH<sub>2</sub>SiMe<sub>3</sub>)<sub>2</sub>(THF)] (**4**)
6. Low Temperature <sup>1</sup>H and <sup>13</sup>C{<sup>1</sup>H} NMR spectra of [(XAd)Th(CH<sub>2</sub>SiMe<sub>3</sub>)<sub>2</sub>(THF)] (**4**)
7. High Temperature <sup>1</sup>H and <sup>13</sup>C{<sup>1</sup>H} NMR spectra of [(XAd)Th(η<sup>3</sup>-allyl<sup>TMS</sup>)<sub>2</sub>] (**5**)
8. Variable Temperature <sup>1</sup>H NMR spectra of [(XAd)Th(η<sup>3</sup>-allyl<sup>TMS</sup>)<sub>2</sub>] (**5**)
9. Low Temperature <sup>1</sup>H NMR spectrum of [(XAd)Th(η<sup>3</sup>-allyl<sup>TMS</sup>)<sub>2</sub>] (**5**)

$^1\text{H}$  NMR spectrum of  $\text{H}_2[\text{XAd}]$  (**1**) in benzene- $d_6$  (600.1 MHz, 298 K)

\* denotes benzene- $d_5$

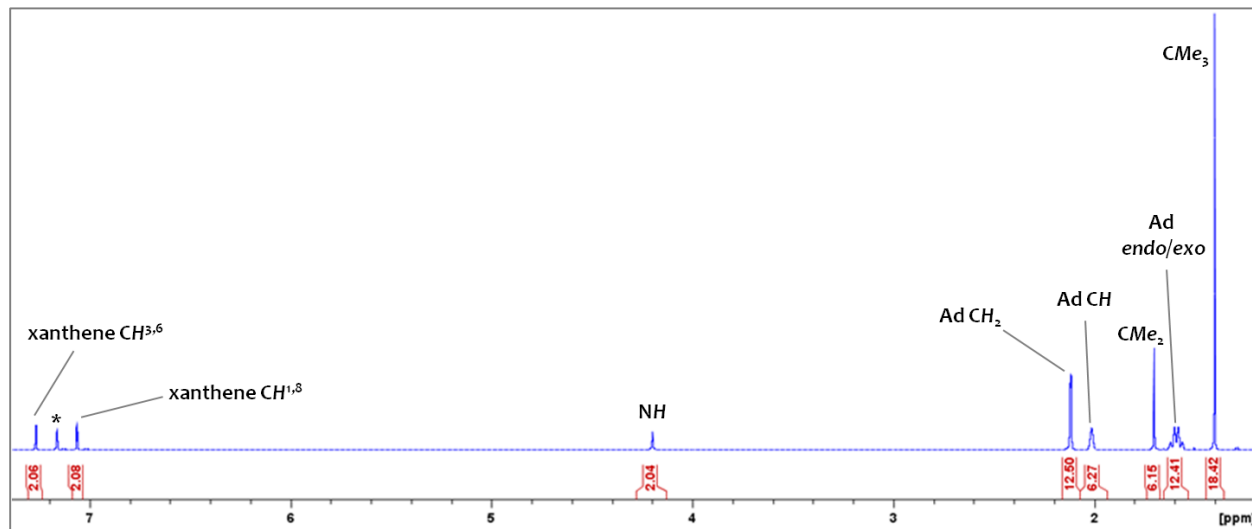

$^{13}\text{C}\{^1\text{H}\}$  NMR spectrum of  $\text{H}_2[\text{XAd}]$  (**1**) in benzene- $d_6$  (150 MHz, 298 K) -  $\text{C}_6\text{D}_6$  signal truncated.

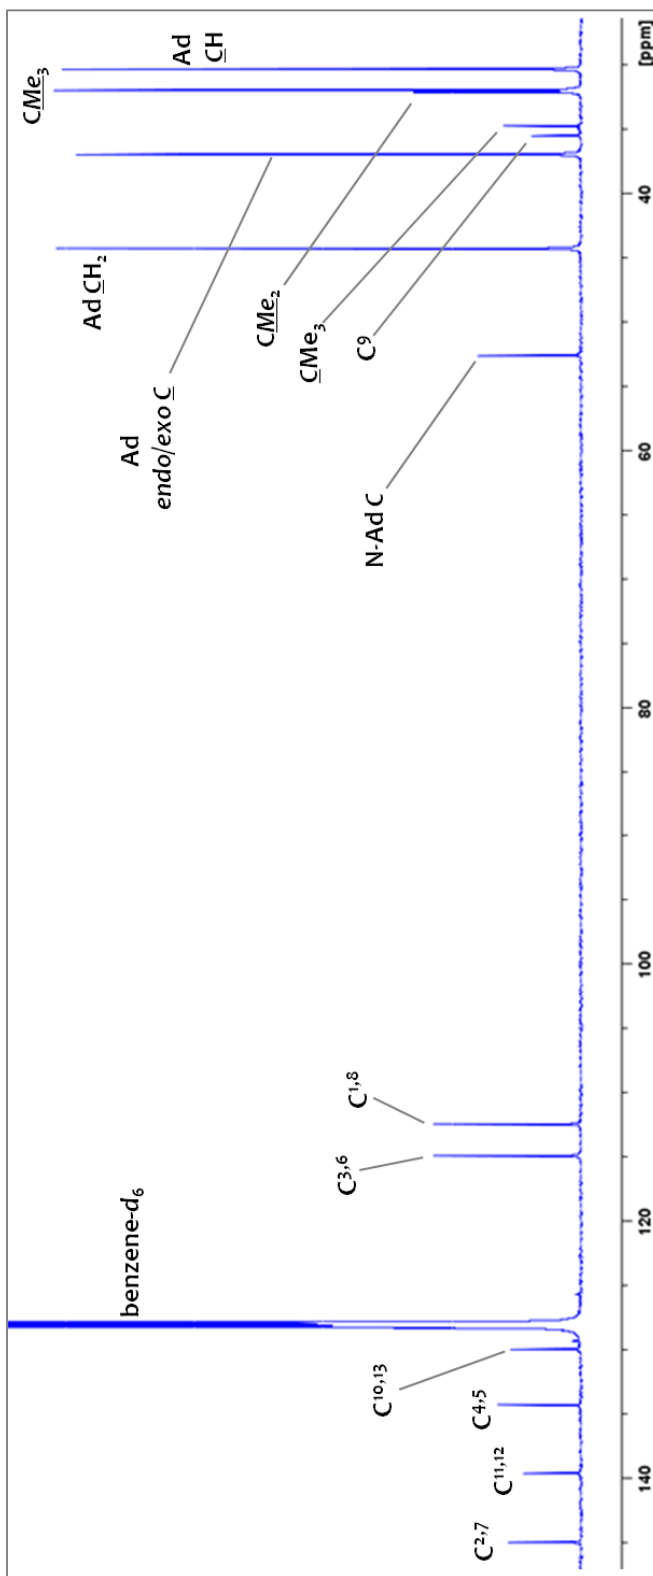

$^1\text{H}$  NMR spectrum of  $[\{\text{K}(\text{THF})_3\}_2(\text{XAd})]$  (**2a**, *in-situ*) in  $\text{THF-}d_8$  (600.1 MHz, 298 K)

\* denotes  $\text{THF-}d_7$ ; the  $\text{CMe}_3$  signal is truncated.

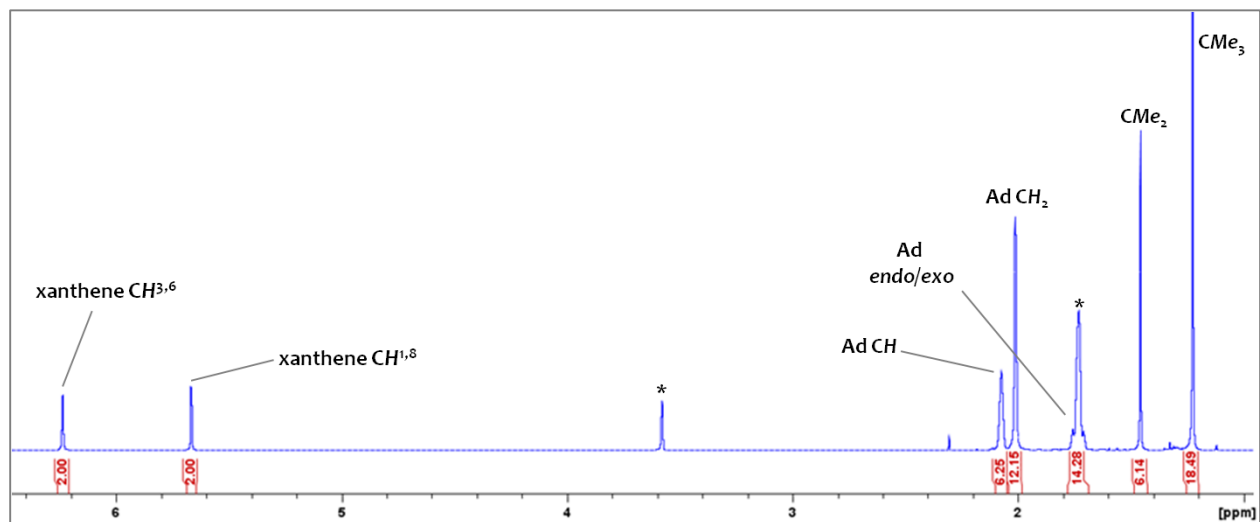

$^{13}\text{C}\{^1\text{H}\}$  NMR spectrum of  $[\{\text{K}(\text{THF})_3\}_2(\text{XAd})]$  (**2a**, *in-situ*) in  $\text{THF-}d_8$  (150 MHz, 298 K)

\* denotes  $\text{THF-}d_8$  ( $\text{THF-}d_8$  signals truncated)

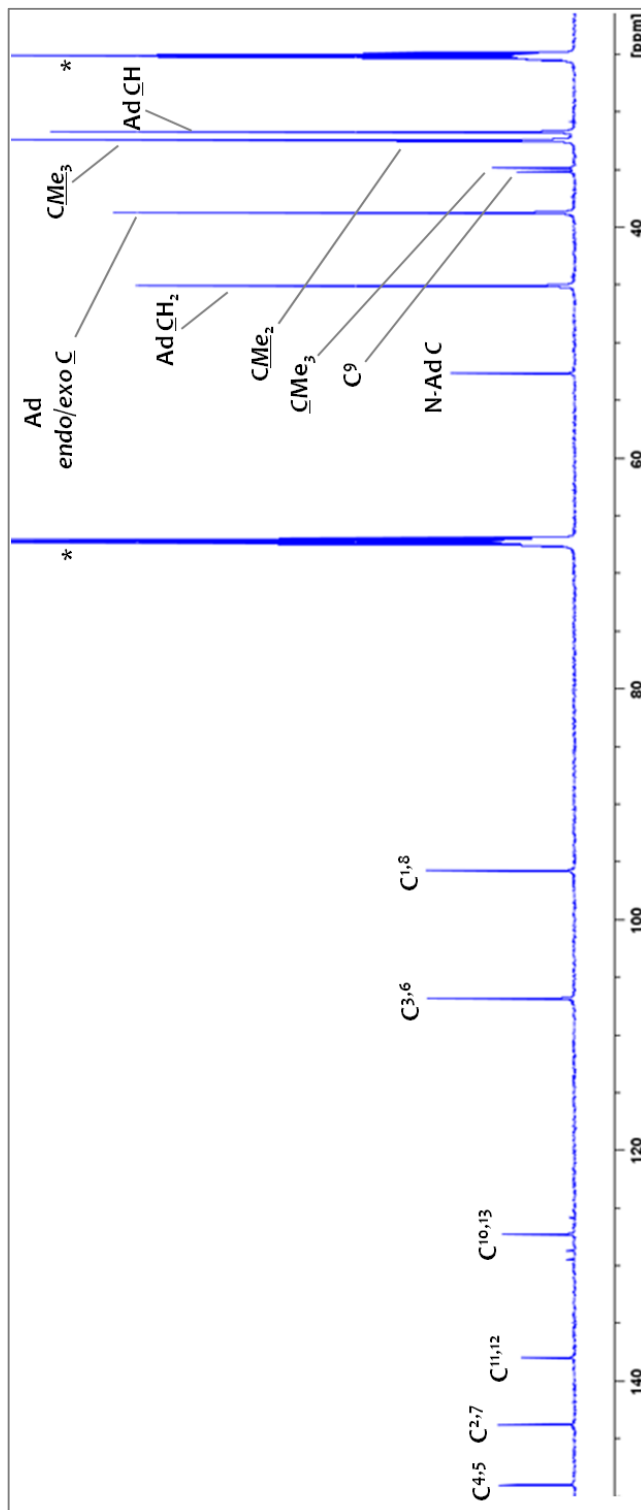

$^1\text{H}$  NMR spectrum of  $[(\text{XAd})\text{ThCl}_4\text{K}_2]\cdot(\text{dme})$  (**3**) in  $\text{THF-}d_8$  (600.1 MHz, 298 K)

\* denotes  $\text{THF-}d_7$ ; the  $\text{CMe}_3$  signal is truncated.

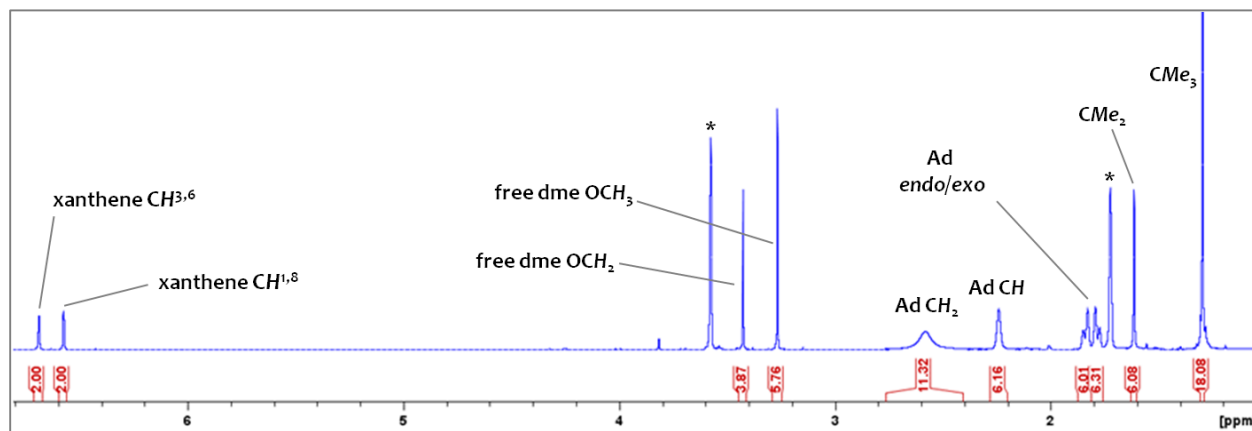

$^{13}\text{C}\{^1\text{H}\}$  NMR spectrum of  $[(\text{XAd})\text{ThCl}_4\text{K}_2]\cdot(\text{dme})$  (**3**) in  $\text{THF-}d_8$  (150 MHz, 298 K)

\* denotes  $\text{THF-}d_8$  ( $\text{THF-}d_8$  signals truncated)

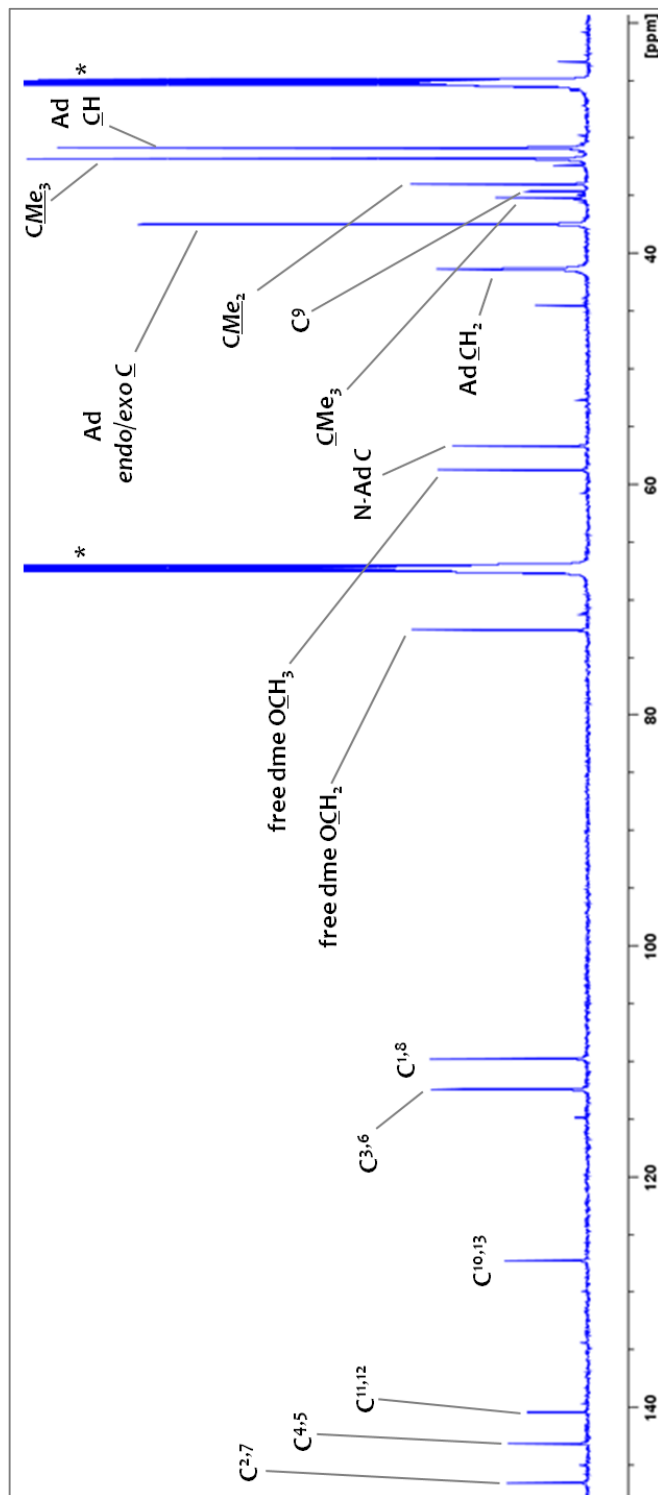

$^1\text{H}$  NMR spectrum of  $[(\text{XAd})\text{Th}(\text{CH}_2\text{SiMe}_3)_2(\text{THF})]$  (**4**) in benzene- $d_6$  (600.1 MHz, 298 K)

\* denotes benzene- $d_5$ ; the  $\text{CMe}_3$  and  $\text{SiMe}_3$  signals are truncated.

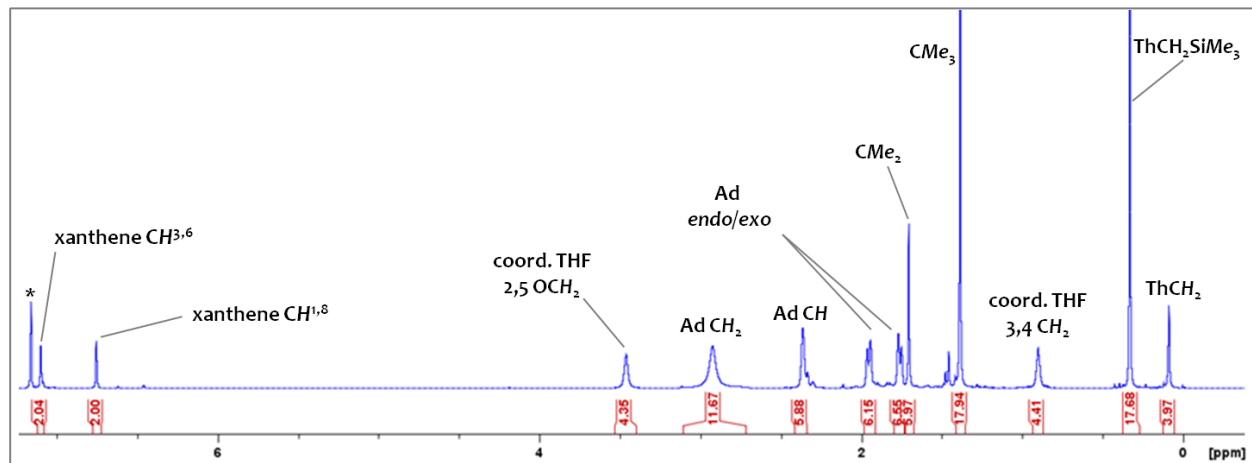



$^{13}\text{C}\{^1\text{H}\}$  NMR spectrum of  $[(\text{XAd})\text{Th}(\text{CH}_2\text{SiMe}_3)_2(\text{THF})]$  (**4**) in benzene- $d_6$  (150 MHz, 298 K)

\* denotes benzene- $d_6$ ; benzene- $d_6$ ,  $\text{CMe}_3$ , and Ad CH peaks are truncated.

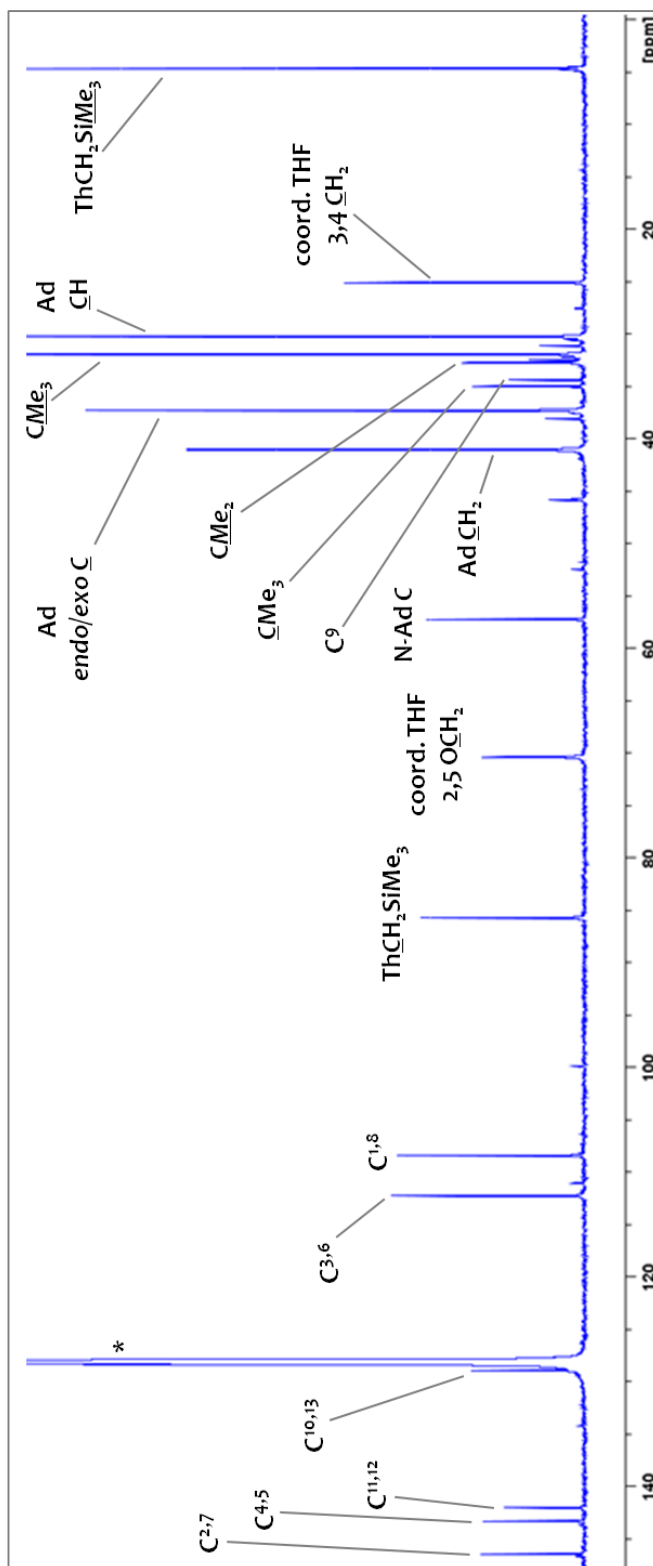

$^{13}\text{C}$  NMR spectrum of  $[(\text{XAd})\text{Th}(\text{CH}_2\text{SiMe}_3)_2(\text{THF})]$  (**4**) in benzene- $d_6$  (150 MHz, 298 K)

- Proton coupled,  $\text{ThCH}_2\text{SiMe}_3$  resonance highlighted

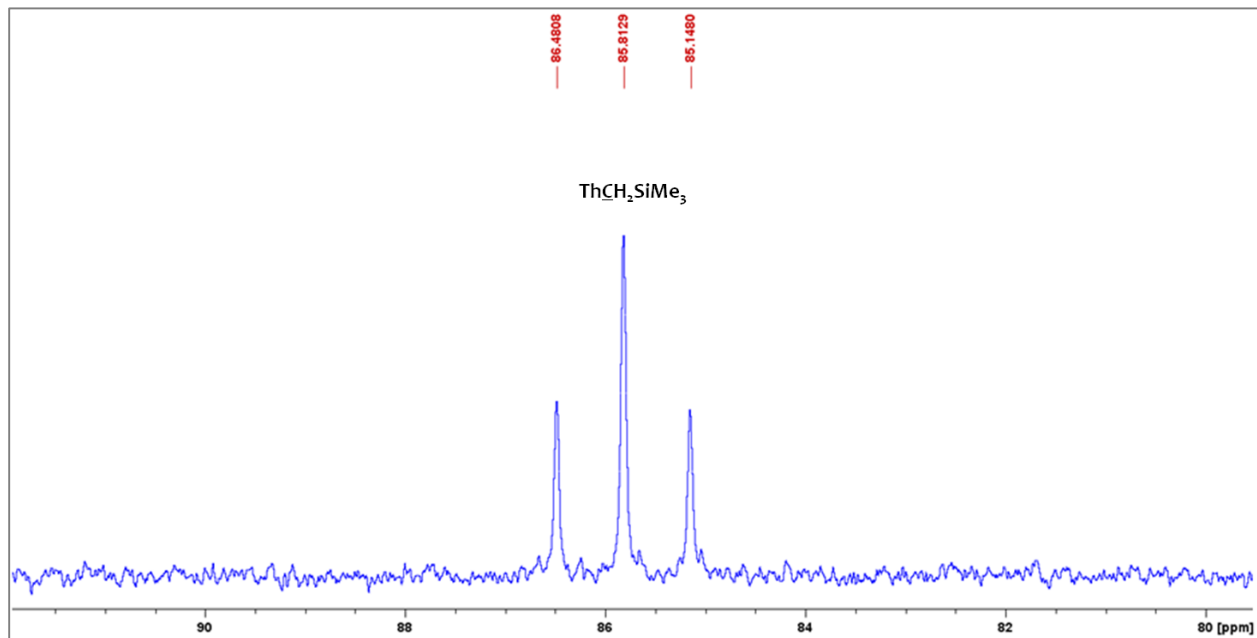

Variable Temperature  $^1\text{H}$  NMR spectra of  $[(\text{XAd})\text{Th}(\text{CH}_2\text{SiMe}_3)_2(\text{THF})]$  (**4**) in toluene- $d_8$  (500.1 MHz, 197–298 K)

\* denotes toluene- $d_7$ , † denotes hexanes; the  $\text{CMe}_3$  and  $\text{SiMe}_3$  signals are truncated.

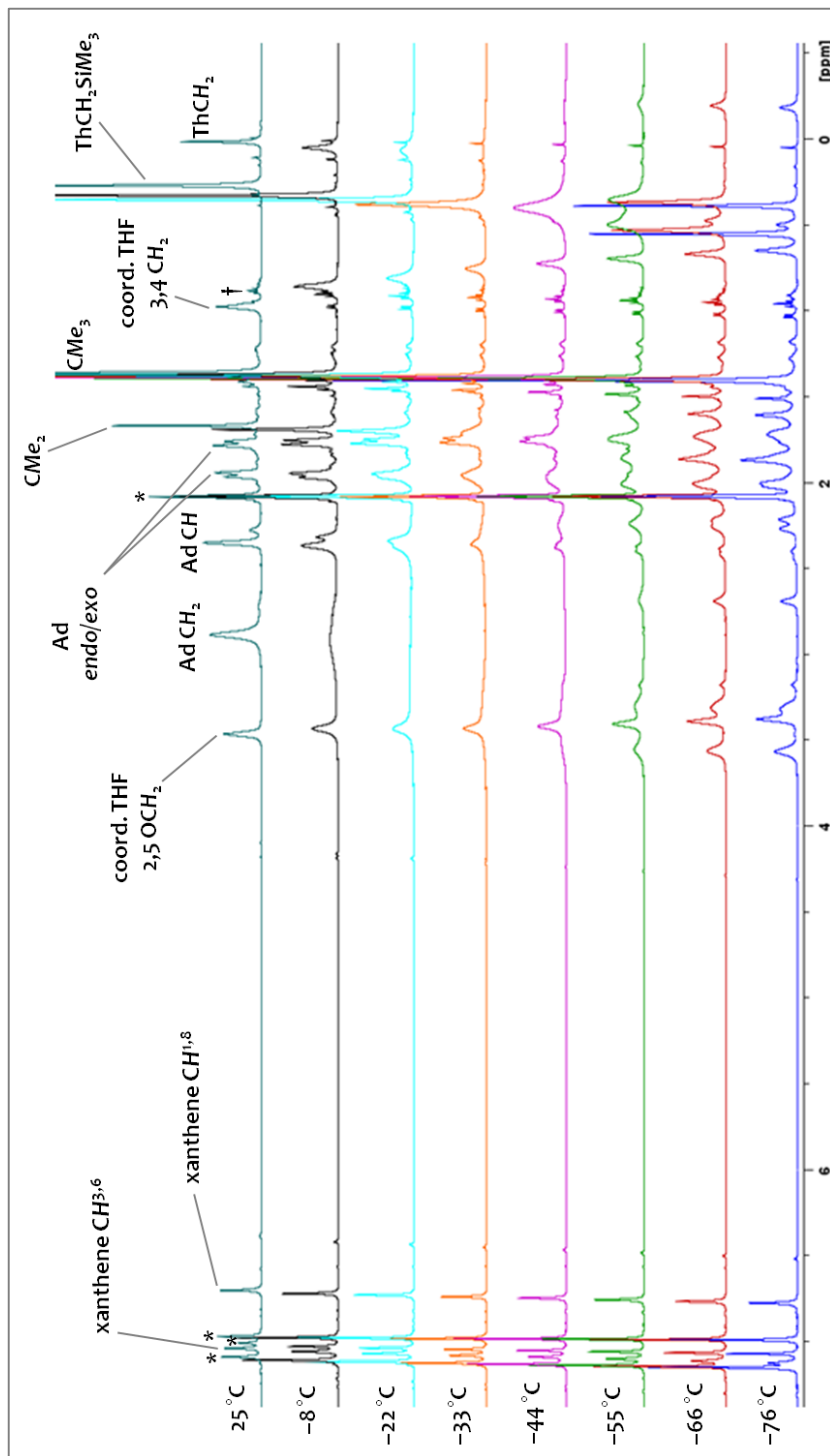

Low T  $^1\text{H}$  NMR spectrum of  $[(\text{XAd})\text{Th}(\text{CH}_2\text{SiMe}_3)_2(\text{THF})]$  (**4**) in toluene- $d_8$  (500.1 MHz, 197 K)

\* denotes toluene- $d_7$ , † denotes hexanes; the  $\text{CMe}_3$  signal is truncated.

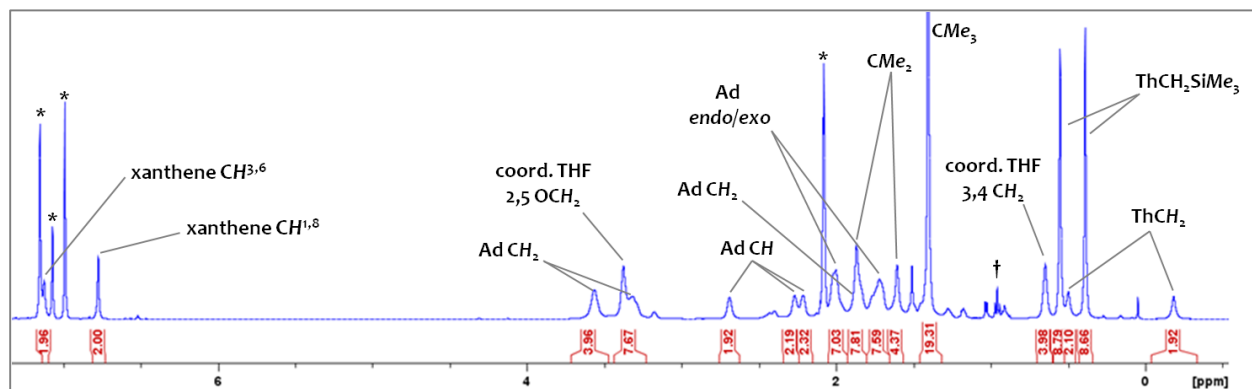

Low T  $^{13}\text{C}\{^1\text{H}\}$  NMR spectrum of  $[(\text{XAd})\text{Th}(\text{CH}_2\text{SiMe}_3)_2(\text{THF})]$  (**4**) in toluene- $d_8$  (125 MHz, 197 K)

\* denotes toluene- $d_8$ ; toluene- $d_8$  signals are truncated. Region between 22 and 44 ppm is expanded on the following page.

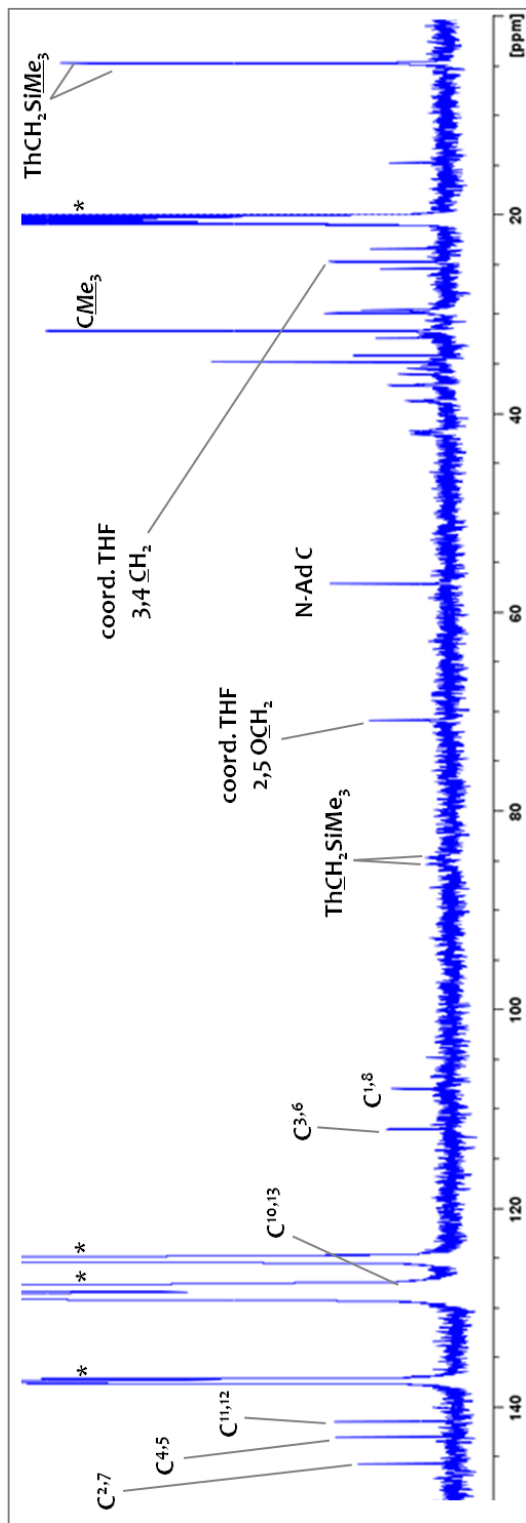

Expanded Region of the Low T  $^{13}\text{C}\{^1\text{H}\}$  NMR spectrum of  $[(\text{XAd})\text{Th}(\text{CH}_2\text{SiMe}_3)_2(\text{THF})]$  (**4**) in toluene- $d_8$  (125 MHz, 197 K)

\* denotes minor impurities (including *n*-hexane at  $\sim 23$  and 32 ppm).

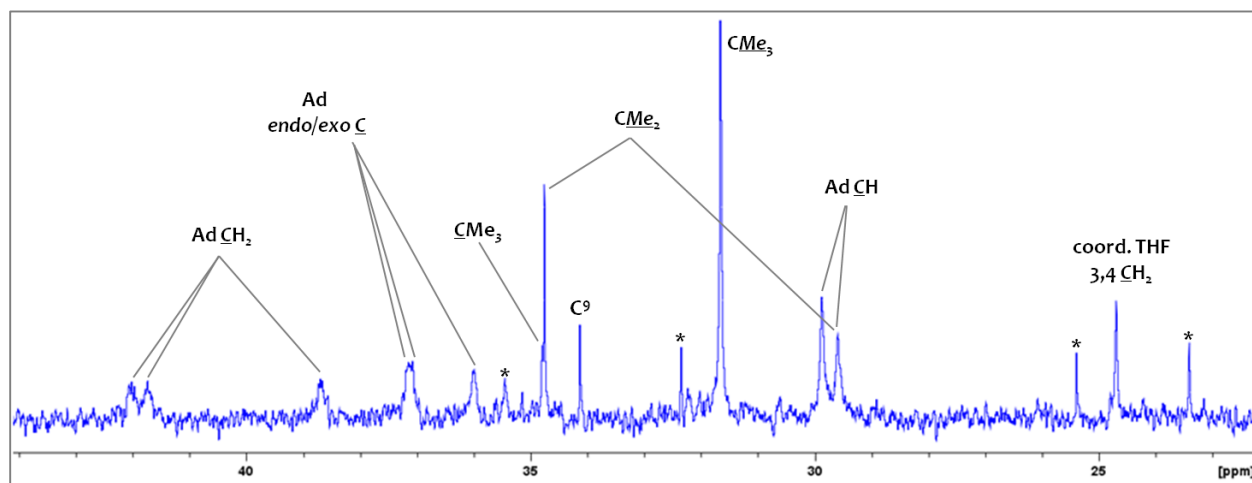

High T  $^1\text{H}$  NMR spectrum of  $[(\text{XAd})\text{Th}(\eta^3\text{-allyl}^{\text{TMS}})_2]$  (**5**) in toluene- $d_8$  (500.1 MHz, 360 K)

\* denotes toluene- $d_7$ , † denotes  $\text{O}(\text{SiMe}_3)_2$ ; the  $\text{CMe}_3$ ,  $\text{O}(\text{SiMe}_3)_2$ , and  $\text{SiMe}_3$  signals are truncated.

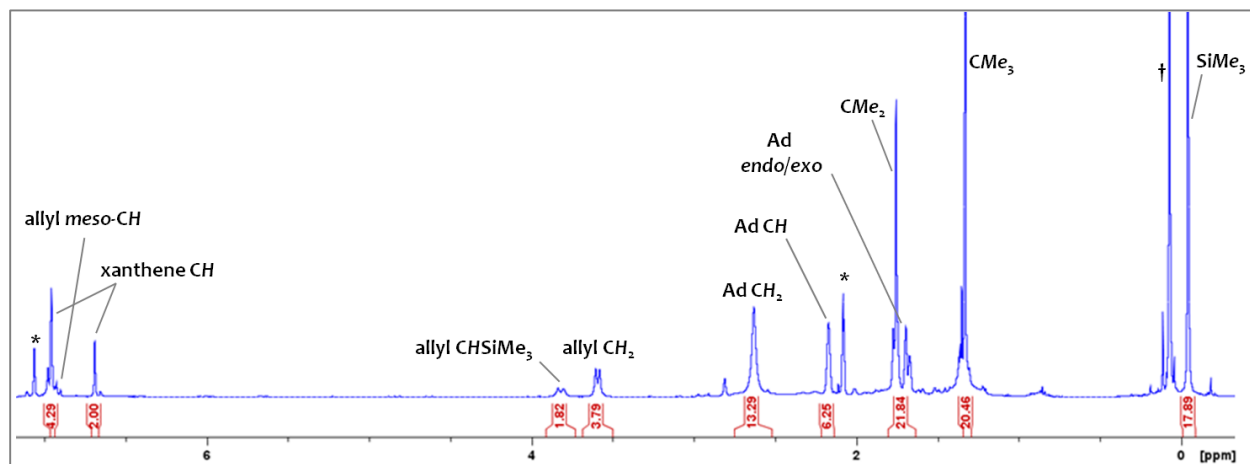

High T  $^{13}\text{C}\{^1\text{H}\}$  NMR spectrum of  $[(\text{XAd})\text{Th}(\eta^3\text{-allyl}^{\text{TMS}})_2]$  (**5**) in toluene- $d_8$  (125 MHz, 350 K)

\* denotes toluene- $d_8$ , † denotes  $\text{O}(\text{SiMe}_3)_2$ ; toluene- $d_8$  and  $\text{O}(\text{SiMe}_3)_2$  peaks are truncated.

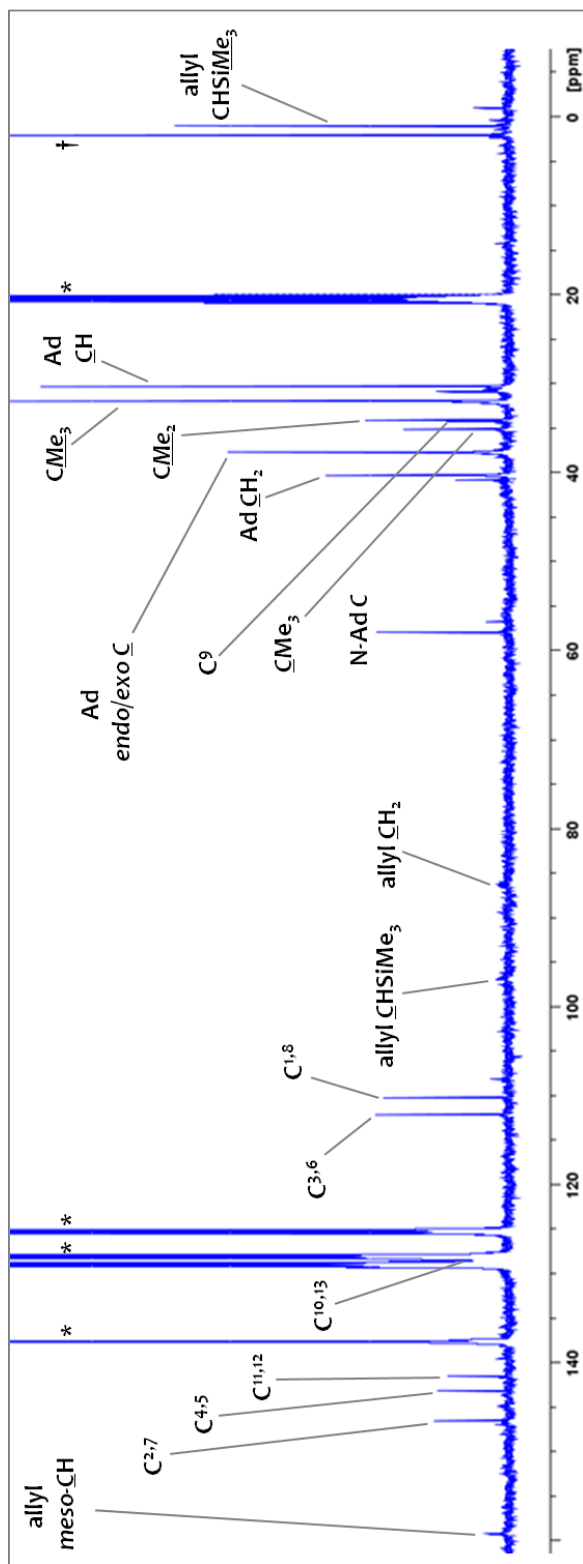



Variable Temperature  $^1\text{H}$  NMR spectra of  $[(\text{XAd})\text{Th}(\eta^3\text{-allyl}^{\text{TMS}})_2]$  (**5**) in toluene- $d_8$  (500.1 MHz, 210–360 K)

Two separate samples were used for the high- and low temperature experiments. \* denotes toluene- $d_7$ , † denotes *n*-pentane, ‡ denotes  $\text{O}(\text{SiMe}_3)_2$ ; the  $\text{CMe}_2$ ,  $\text{CMe}_3$ ,  $\text{O}(\text{SiMe}_3)_2$ , and  $\text{SiMe}_3$  signals are truncated.

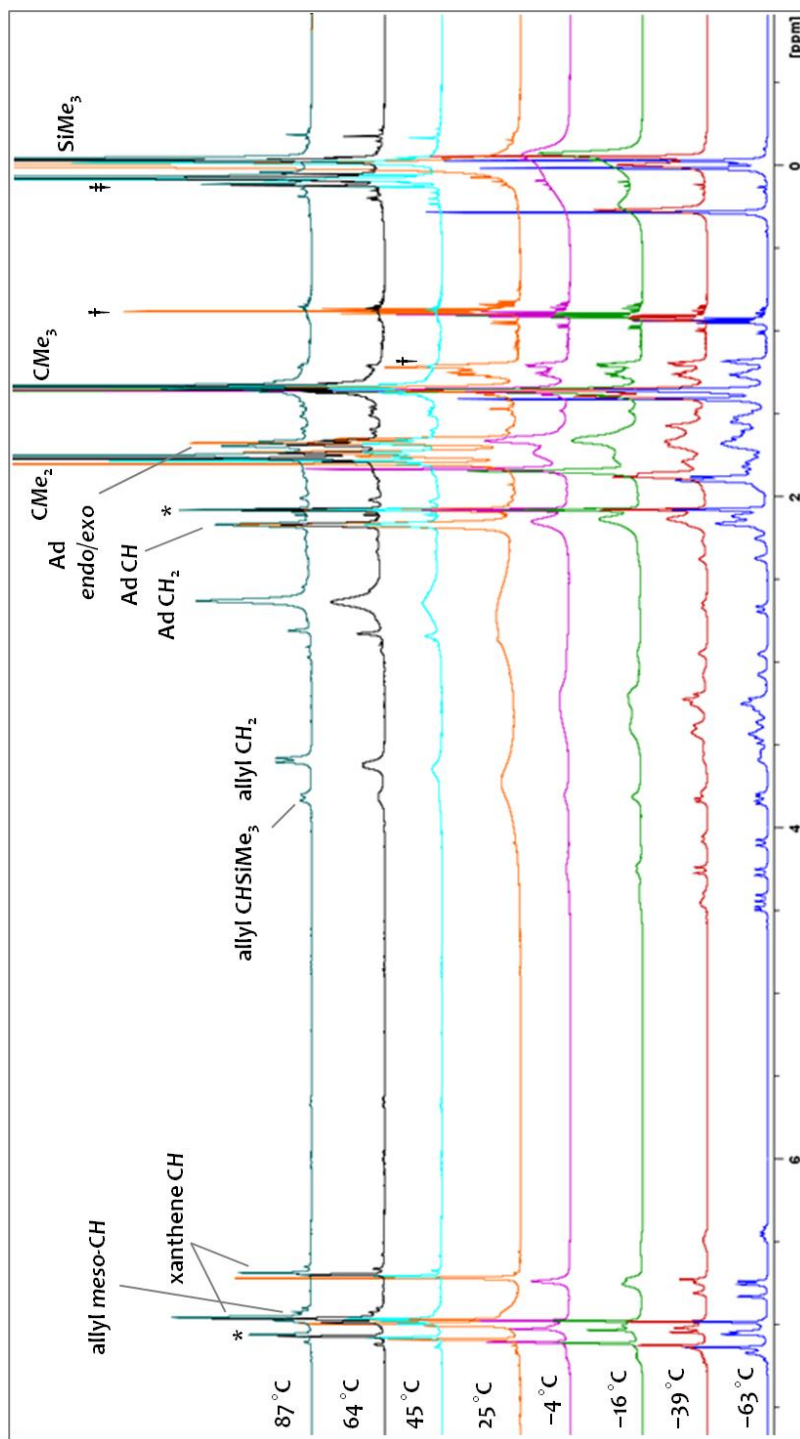

Variable Temperature  $^1\text{H}$  NMR spectra of  $[(\text{XAd})\text{Th}(\eta^3\text{-allyl}^{\text{TMS}})_2]$  (**5**) in toluene- $d_8$  (500.1 MHz, 210–360 K)

Silyl region highlighted; two separate samples were used for the high- and low temperature experiments {the sample used for high-temperature experiments contains  $\text{O}(\text{SiMe}_3)_2$ .

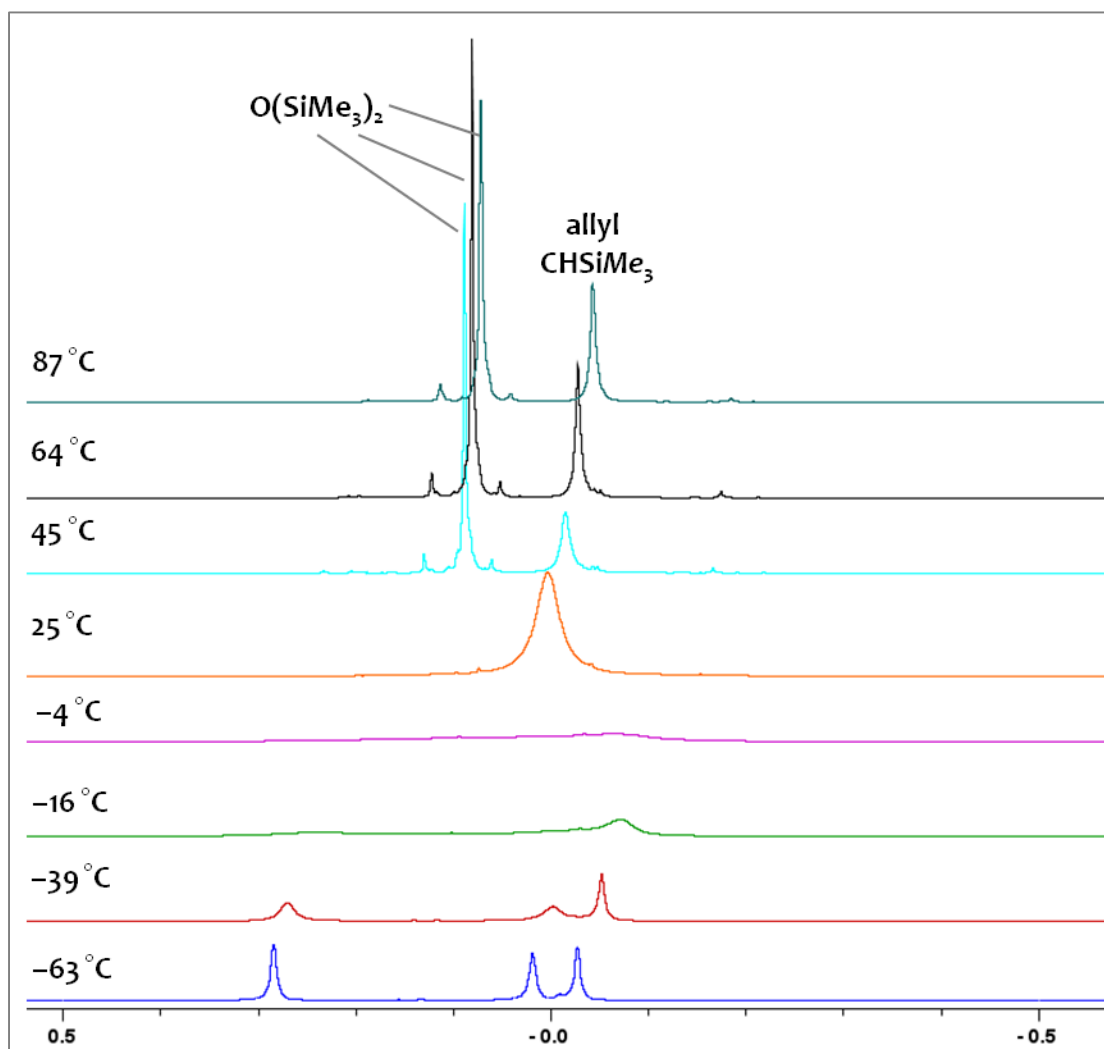

Low T  $^1\text{H}$  NMR spectrum of  $[(\text{XAd})\text{Th}(\eta^3\text{-allyl}^{\text{TMS}})_2]$  (**5**) in toluene- $d_8$  (500.1 MHz, 210 K)

Selected resonances highlighted. \* denotes toluene- $d_7$ , † denotes  $n$ -pentane; the  $\text{CMe}_3$ , and  $\text{SiMe}_3$  signals are truncated.

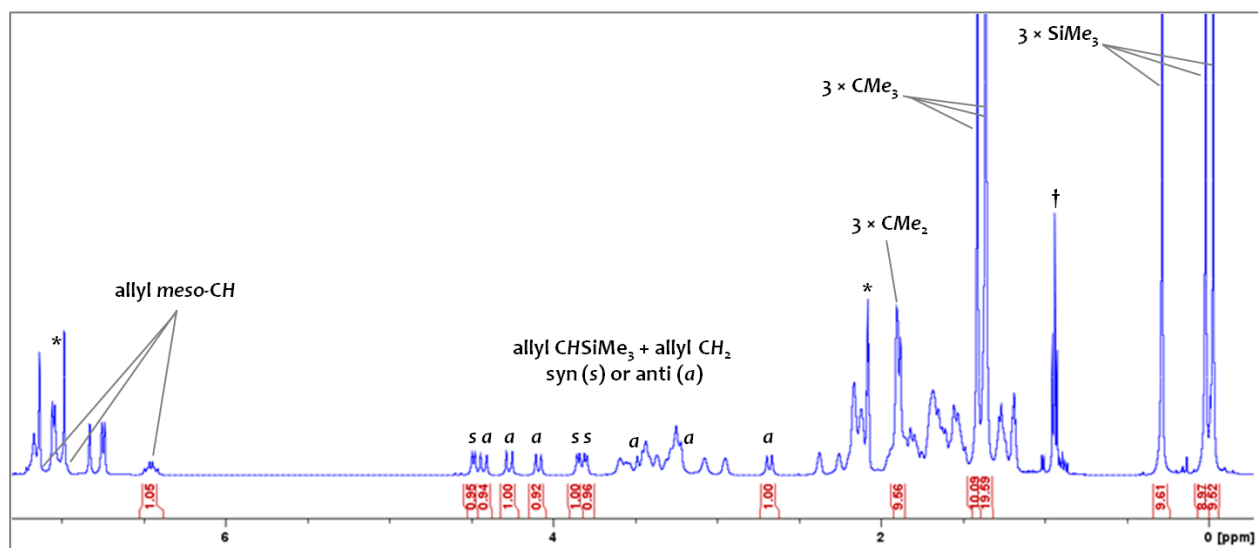

Supplement: c8dt00421h1.pdf [file c8dt00421h1.pdf]
